# Supplementary material for: Behavior of wormlike micellar solutions formed without any additives from semi-fluorinated quaternary ammonium salts
Source: Royal Society of Chemistry journal article supplement (doi:10.1039/c3sm51591e), 2013-01-01
Supplement: c3sm51591e.pdf [file c3sm51591e.pdf]

# Supporting informations

## Behavior of wormlike micellar solutions formed without any additives from semi-fluorinated quaternary ammonium salts

*Gennifer Padoan,<sup>a,b</sup> Elisabeth Taffin de Givenchy,<sup>a</sup> Alessandro Zaggia,<sup>b</sup> Sonia Amigoni,<sup>a</sup> Thierry Darmanin,<sup>a</sup> Lino Conte<sup>b</sup> and Frédéric Guittard,<sup>a,\*</sup>*

<sup>a</sup> Université de Nice – Sophia Antipolis & CNRS, Laboratoire de Physique de la Matière Condensée, UMR 7336, Parc Valrose, 06108 Nice Cedex 2, France

<sup>b</sup> Department of Chemical Processes of Engineering, University of Padua, Via Marzolo 9, 35131, Padua, Italy

\*guittard@unice.fr

### I- Chemical characterizations of the synthesized products

#### Tertiary Amines (A<sub>n,m</sub>)

A<sub>8,1</sub>

**Yield 95 %**

**spectral data: MS *m/z* (rel. ab. %):** 521 ([M]<sup>+</sup>, 5 %); 506 ([M-CH<sub>3</sub>]<sup>+</sup>, 20 %), 88 ([M-CF<sub>3</sub>(CF<sub>2</sub>)<sub>7</sub>, -CH<sub>2</sub>]<sup>+</sup>, 10 %), 58 ([M-CF<sub>3</sub>(CF<sub>2</sub>)<sub>8</sub>CHOHCH<sub>2</sub>]<sup>+</sup>, 100 %);

**<sup>1</sup>H NMR (CD<sub>3</sub>OD):** δ = 2.39 (m, CH<sub>2</sub>(a), 2H); 2.6 (m, CH(b), 1H); 2.49 (d, CH<sub>2</sub>(c), 2H); 2.29 (t, CH<sub>3</sub>(d), 6H); 4.2 (d, OH(e), 1H).

**<sup>19</sup>F NMR (CD<sub>3</sub>OD):** δ = -80.9 (t, CF<sub>3</sub>(a), 3F); -111.7 (m, CF<sub>2</sub>CH<sub>2</sub>(b), 2F); -126.2 (m, CF<sub>2</sub>(c), 2F); -123.3 (m, CF<sub>2</sub>(d), 2F); -122.8 (m, CF<sub>2</sub>(e), 2F); -121.9 (m, CF<sub>2</sub>(f), 2F); -121.6 (m, CF<sub>2</sub>(g,h), 4F).

### A<sub>8,2</sub>

#### Yield 84 %

**spectral data: MS *m/z* (rel. ab. %):** 549 ([M]<sup>+</sup>●, 3 %), 116 ([M-CF<sub>3</sub>(CF<sub>2</sub>)<sub>7</sub>, -CH<sub>2</sub>]<sup>+</sup>, 30 %), 86 ([M-CF<sub>3</sub>(CF<sub>2</sub>)<sub>8</sub>CHOHCH<sub>2</sub>]<sup>+</sup>, 100 %), 69 [CF<sub>3</sub>]<sup>+</sup> 15 %;

**<sup>1</sup>H NMR (CD<sub>3</sub>OD):** δ = 2.18(m, CH<sub>2</sub>(a), 1H); 2.49 (m, CH<sub>2</sub>(a), 1H); 4.2 (d-d, CH(b), 1H); 2.49 (m, CH<sub>2</sub>(c,d), 6H); 1.04 (t, CH<sub>3</sub>(e), 6H); 4.1 (d-d,OH(f), 1H).

**<sup>19</sup>F NMR (CD<sub>3</sub>OD):** δ = -80.9 (t, CF<sub>3</sub>(a), 3F); -111.7 (m, CF<sub>2</sub>CH<sub>2</sub>(b), 2F); -126.2 (m, CF<sub>2</sub>(c), 2F); -123.3 (m, CF<sub>2</sub>(d), 2F);-122.8 (m, CF<sub>2</sub>(e), 2F);-121.9 (m, CF<sub>2</sub>(f), 2F); -121.6 (m, CF<sub>2</sub>(g,h), 4F).

### A<sub>6,1</sub>

#### Yield 94 %

**spectral data: MS *m/z* (rel. ab. %):** 421 ([M]<sup>+</sup>●, 5 %); 406 ([M-CH<sub>3</sub>]<sup>+</sup>, 20 %), 88 ([M-CF<sub>3</sub>(CF<sub>2</sub>)<sub>7</sub>, -CH<sub>2</sub>]<sup>+</sup>, 100 %), 58 ([M-CF<sub>3</sub>(CF<sub>2</sub>)<sub>8</sub>CHOHCH<sub>2</sub>]<sup>+</sup>, 100 %);

**<sup>1</sup>H NMR (CD<sub>3</sub>OD):** δ = 2.39 (m, CH<sub>2</sub>(a), 2H); 2.6 (m, CH(b), 1H); 2.49 (d, CH<sub>2</sub>(c), 2H); 2.29 (t, CH<sub>3</sub>(d), 6H); 4.2 (d, OH(e), 1H).

**<sup>19</sup>F NMR (CD<sub>3</sub>OD):** δ = -80.9 (t, CF<sub>3</sub>(a), 3F); -111.7 (m, CF<sub>2</sub>CH<sub>2</sub>(b), 2F); -126.2 (m, CF<sub>2</sub>(c), 2F); -123.3 (m, CF<sub>2</sub>(d), 2F);-122.8 (m, CF<sub>2</sub>(e), 2F);-121.8 (m, CF<sub>2</sub>(f), 2F).

### A<sub>6,2</sub>

#### Yield 89 %

**spectral data: MS *m/z* (rel. ab. %):** 449 ([M]<sup>+</sup>●, 5 %); 116 ([M-CF<sub>3</sub>(CF<sub>2</sub>)<sub>7</sub>, -CH<sub>2</sub>]<sup>+</sup>, 30 %), 86 ([M-CF<sub>3</sub>(CF<sub>2</sub>)<sub>8</sub>CHOHCH<sub>2</sub>]<sup>+</sup>, 100 %);

**<sup>1</sup>H NMR (CD<sub>3</sub>OD):** δ = 2.18 (m, CH<sub>2</sub> (a), 1H); 2.49 (m, CH<sub>2</sub> (a), 1H); 4.2 (d-d, CH(b), 1H); 2.49 (m, CH<sub>2</sub>(c,d), 6H); 1.04 (t, CH<sub>3</sub>(e), 6H); 4.1 (d-d, OH(f), 1H).

**<sup>19</sup>F NMR (CD<sub>3</sub>OD):** δ = -80.9 (t, CF<sub>3</sub>(a), 3F); -111.7 (m, CF<sub>2</sub>CH<sub>2</sub> (b), 2F); -126.2 (m, CF<sub>2</sub>(c), 2F); -123.3 (m, CF<sub>2</sub> (d), 2F);-122.8 (m, CF<sub>2</sub> (e), 2F);-121.8 (m, CF<sub>2</sub> (f), 2F).

### A<sub>4,1</sub>

#### Yield 93 %

**spectral data: MS *m/z* (rel. ab. %):** 321 ([M]<sup>+</sup>●, 5 %); 306 ([M-CH<sub>3</sub>]<sup>+</sup>, 20 %), 88 ([M-CF<sub>3</sub>(CF<sub>2</sub>)<sub>7</sub>, -CH<sub>2</sub>]<sup>+</sup>, 100 %), 58 ([M-CF<sub>3</sub>(CF<sub>2</sub>)<sub>8</sub>CHOHCH<sub>2</sub>]<sup>+</sup>, 100 %);

**<sup>1</sup>H NMR (CD<sub>3</sub>OD):** δ = 2.39 (m, CH<sub>2</sub>(a), 2H); 2.6 (m, CH(b), 1H); 2.49 (d, CH<sub>2</sub>(c), 2H); 2.29 (t, CH<sub>3</sub>(d), 6H); 4.2 (d, OH(e), 1H).

**<sup>19</sup>F NMR (CD<sub>3</sub>OD):** δ = -80.9 (t, CF<sub>3</sub>(a), 3F); -111.7 (m, CF<sub>2</sub>CH<sub>2</sub>(b), 2F); -126.2 (m, CF<sub>2</sub>(c), 2F); -123.3 (m, CF<sub>2</sub>(d), 2F);-122.8 (m, CF<sub>2</sub>(e), 2F);-121.8 (m, CF<sub>2</sub>(f), 2F).

## A<sub>4,2</sub>

**Yield 80 %**

**spectral data: MS *m/z* (rel. ab. %):** 349 ([M]<sup>+</sup>•, 10 %), 116 ([M-CF<sub>3</sub>(CF<sub>2</sub>)<sub>7</sub>, -CH<sub>2</sub>]<sup>+</sup>, 30 %), 86 ([M-CF<sub>3</sub>(CF<sub>2</sub>)<sub>8</sub>CH<sub>2</sub>OHCH<sub>2</sub>]<sup>+</sup>, 100 %);

<sup>1</sup>H NMR (CD<sub>3</sub>OD): δ = 2.18 (m, CH<sub>2</sub>(a), 1H); 2.49 (m, CH<sub>2</sub>(a), 1H); 4.2 (d-d, CH(b), 1H); 2.49 (m, CH<sub>2</sub>(c,d), 6H); 1.04 (t, CH<sub>3</sub>(e), 6H); 4.1 (d-d, OH(f), 1H).

<sup>19</sup>F NMR (CD<sub>3</sub>OD): δ = -80.9 (t, CF<sub>3</sub>(a), 3F); -111.7 (m, CF<sub>2</sub>CH<sub>2</sub>(b), 2F); -126.2 (m, CF<sub>2</sub>(c), 2F); -123.3 (m, CF<sub>2</sub>(d), 2F).

## Quaternary ammonium salts (F<sub>n</sub>H<sub>m</sub>)

### F<sub>8</sub>H<sub>1</sub>

**Yield 91 % from A<sub>8,1</sub>**

<sup>1</sup>H NMR (CD<sub>3</sub>OD): δ = 2.24 (m, CH<sub>2</sub>(a), 2H); 4.6 (m, CH(b), 1H); 3.51 (t, CH<sub>2</sub>(c), 2H); 3.26 (m, CH<sub>3</sub>(d), 9H); 4.7 (m, OH(e), 1H).

<sup>19</sup>F NMR (CD<sub>3</sub>OD): δ = -80.9 (t, CF<sub>3</sub>(a), 3F); -111.7 (m, CF<sub>2</sub>CH<sub>2</sub>(b), 2F); -126.2 (m, CF<sub>2</sub>(c), 2F); -123.3 (m, CF<sub>2</sub>(d), 2F).

### F<sub>8</sub>H<sub>2</sub>

**Yield 88 % from A<sub>8,2</sub>**

<sup>1</sup>H NMR (CD<sub>3</sub>OD): δ = 2.46 (m, CH<sub>2</sub>(a), 2H); 4.6 (m, CH(b), 1H); 3.52 (m, CH<sub>2</sub>(c,d), 6H); 3.14 (s, CH<sub>3</sub>(e), 3H); 4.7 (m, CH(f), 1H); 1.37 (t, CH<sub>3</sub>(g), 6H).

<sup>19</sup>F NMR (CD<sub>3</sub>OD): δ = -80.9 (t, CF<sub>3</sub>(a), 3F); -111.7 (m, CF<sub>2</sub>CH<sub>2</sub>(b), 2F); -126.2 (m, CF<sub>2</sub>(c), 2F); -123.3 (m, CF<sub>2</sub>(d), 2F); -122.8 (m, CF<sub>2</sub>(e), 2F); -121.9 (m, CF<sub>2</sub>(f), 2F); -121.6 (m, CF<sub>2</sub>(g,h), 4F).

### F<sub>6</sub>H<sub>1</sub>

**Yield 94 % from A<sub>6,1</sub>**

<sup>1</sup>H NMR (CD<sub>3</sub>OD): δ = 2.24 (m, CH<sub>2</sub>(a), 2H); 4.6 (m, CH(b), 1H); 3.51 (t, CH<sub>2</sub>(c), 2H); 3.26 (m, CH<sub>3</sub>(d), 9H); 4.7 (m, OH(e), 1H).

<sup>19</sup>F NMR (CD<sub>3</sub>OD): δ = -80.9 (t, CF<sub>3</sub>(a), 3F); -111.7 (m, CF<sub>2</sub>CH<sub>2</sub>(b), 2F); -126.2 (m, CF<sub>2</sub>(c), 2F); -123.3 (m, CF<sub>2</sub>(d), 2F); -122.8 (m, CF<sub>2</sub>(e), 2F); -121.8 (m, CF<sub>2</sub>(f), 2F).

### F<sub>6</sub>H<sub>2</sub>

**Yield 89 % from A<sub>6,2</sub>**

<sup>1</sup>H NMR (CD<sub>3</sub>OD): δ = 2.46 (m, CH<sub>2</sub>(a), 2H); 4.6 (m, CH(b), 1H); 3.52 (m, CH<sub>2</sub>(c,d), 6H); 3.14 (s, CH<sub>3</sub>(e), 3H); 4.7 (m, CH(f), 1H); 1.37 (t, CH<sub>3</sub>(g), 6H).

<sup>19</sup>F NMR (CD<sub>3</sub>OD): δ = -80.9 (t, CF<sub>3</sub>(a), 3F); -111.7 (m, CF<sub>2</sub>CH<sub>2</sub>(b), 2F); -126.2 (m, CF<sub>2</sub>(c), 2F); -123.3 (m, CF<sub>2</sub>(d), 2F); -122.8 (m, CF<sub>2</sub>(e), 2F); -121.8 (m, CF<sub>2</sub>(f), 2F).

## F<sub>4</sub>H<sub>1</sub>

### Yield 93 % from A<sub>4,1</sub>

<sup>1</sup>H NMR (CD<sub>3</sub>OD): δ = 2.24 (m, CH<sub>2</sub>(a), 2H); 4.6 (m, CH(b), 1H); 3.51 (t, CH<sub>2</sub>(c), 2H); 3.26 (m, CH<sub>3</sub>(d), 9H); 4.7 (m, OH(e), 1H).

<sup>19</sup>F NMR (CD<sub>3</sub>OD): δ = -80.9 (t, CF<sub>3</sub>(a), 3F); -111.7 (m, CF<sub>2</sub>CH<sub>2</sub>(b), 2F); -126.2 (m, CF<sub>2</sub>(c), 2F); -123.3 (m, CF<sub>2</sub>(d), 2F).

## F<sub>4</sub>H<sub>2</sub>

### Yield 73 % from A<sub>4,2</sub>

<sup>1</sup>H NMR (CD<sub>3</sub>OD): δ = 2.46 (m, CH<sub>2</sub>(a), 2H); 4.6 (m, CH(b), 1H); 3.52 (m, CH<sub>2</sub>(c,d), 6H); 3.14 (s, CH<sub>3</sub>(e), 3H); 4.7 (m, CH(f), 1H); 1.37 (t, CH<sub>3</sub>(g), 6H).

<sup>19</sup>F NMR (CD<sub>3</sub>OD): δ = -80.9 (t, CF<sub>3</sub>(a), 3F); -111.7 (m, CF<sub>2</sub>CH<sub>2</sub>(b), 2F); -126.2 (m, CF<sub>2</sub>(c), 2F); -123.3 (m, CF<sub>2</sub>(d), 2F).

## II- Surfactant properties

The surface tensions of the aqueous solutions of the fluorinated surfactants were measured using a Kruss K100 tensiometer by the Wilhelmy plate technique [N.R. Pallas, B.A. Pethica, Colloids Surf. 36 (1989) 369]. All of the measurements were performed at 25 °C

Table 1 : surface tension at the critical micellar concentration  $\gamma_{cmc}$  and  $cmc$  measured for the synthesized surfactants

| <i>surfactants</i>            | $\gamma_{cmc}$<br>[mN/m] | $cmc$<br>[mmol/L] |
|-------------------------------|--------------------------|-------------------|
| F <sub>8</sub> H <sub>1</sub> | 15.7                     | 0.840             |
| F <sub>6</sub> H <sub>1</sub> | 16.6                     | 1.280             |
| F <sub>4</sub> H <sub>1</sub> | 19                       | 1.470             |
| F <sub>8</sub> H <sub>2</sub> | 17.5                     | 0.756             |
| F <sub>6</sub> H <sub>2</sub> | 20.2                     | 1.200             |
| F <sub>4</sub> H <sub>2</sub> | 22.9                     | 1.360             |

### III- DLS measurments

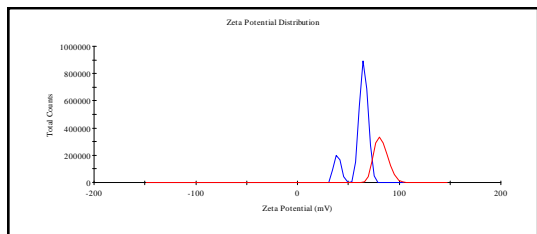

**Figure 1.** Zeta potential for  $F_8H_1$ . Red at  $C_1=20\text{xcmc}$ , blue  $F_8H_1$  at  $C_2=30\text{xcmc}$

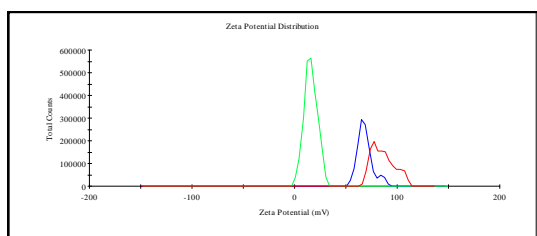

**Figure 2.** Zeta potential for  $F_8H_2$ . Red at  $C_1=20\text{xcmc}$ , blue  $F_8H_2$  at  $C_2=30\text{xcmc}$ , green  $F_8H_2$  at  $C_3=40\text{xcmc}$ .

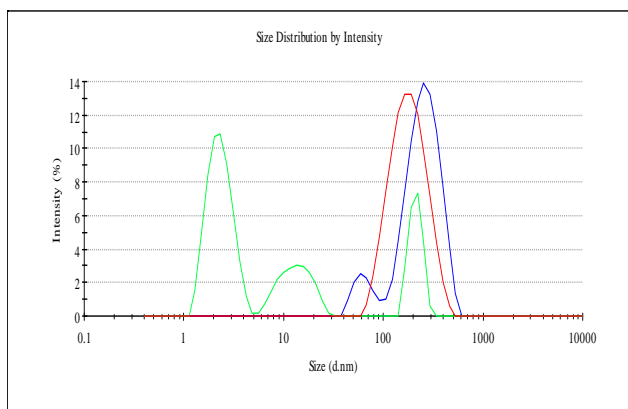

**Figure 3.** Variation in diameter as a function of fluorinated chain. Blue line for  $F_8H_1$ , green line for  $F_6H_1$ , red line for  $F_4H_1$ .

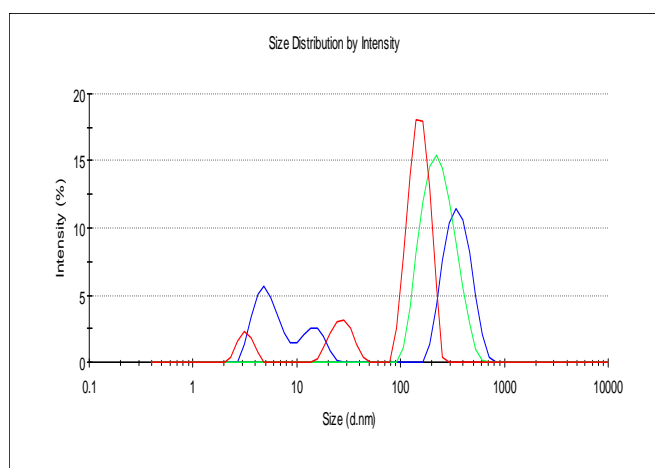

**Figure 4.** Variation in diameter as function of the fluorinated chain. Blue line for  $F_8H_2$ , Red line for  $F_6H_2$ , green line for  $F_4H_2$ .

#### IV-Rheological curves

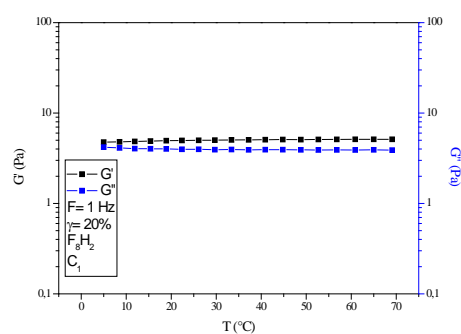

**Figure 5.** Storage and loss modulus at  $C_1=20\text{xcmc}$  as function of temperature for  $F_8H_2$

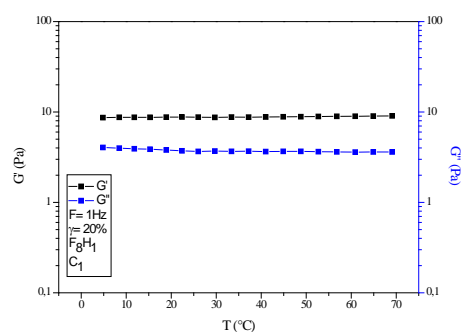

**Figure 6.** Storage and loss modulus at  $C_1=20\text{xcmc}$  as function of temperature for  $F_8H_1$ .

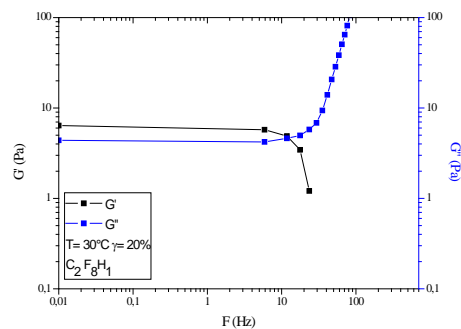

**Figure 7.**  $G'$  and  $G''$  as function of frequency for  $F_8H_2$  at  $C_2=30xcmc$

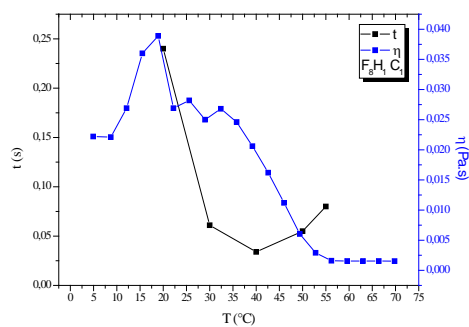

**Figure 8.** Correlation between viscosity and relaxation time for  $F_8H_1$  at  $C_2=30xcmc$

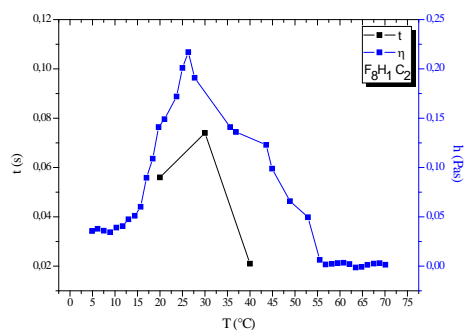

**Figure 8.** Correlation between viscosity and relaxation time for  $F_8H_1$  at  $C_1=20xcmc$

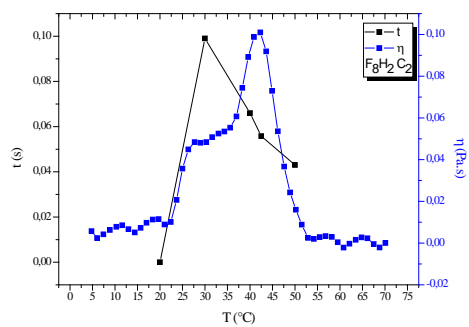

**Figure 9.** Correlation between viscosity and relaxation time for  $F_8H_2$  at  $C_2=30xcmc$
